# Supplementary material
Source: PubMed Central journal article supplement (PMC9046361)
Supplement: 520_2022_6833_MOESM1_ESM.pdf [file 520_2022_6833_MOESM1_ESM.pdf]

**Attachment: Excerpts from the CARPE DIEM study questionnaires including the aspects addressed in the manuscript (translated from German)**

- the assessment timepoints for each question are indicated in brackets
- $t_0$  = baseline;  $t_1$  = about one month after reading the information booklet;  $t_2$  = about four months after reading the information booklet
- numbering of the questions doesn't correspond to the original questionnaires

**1. Have you ever heard of the term "fatigue"? [ $t_0$ ]**

- No, I have never heard of it. →continue with question 2.
- I have heard of it, but I actually don't know what it means. →continue with question 2.
- I have somewhat heard of it or read about it.
- I am very well informed about it.

**1.1 Where did you get your information about fatigue? (multiple answers are possible)**

- from my treating physicians
- from my general practitioner
- from nurses
- from other patients
- I have read about it on the internet.
- I have read about it in booklets, books or articles.
- from informative meetings
- other sources of information → which ones? \_\_\_\_\_

**2. Which of the following statements do you consider as true or false? [ $t_0, t_1, t_2$ ]**

If you are not completely sure, please tick the answer that you consider as most likely to be appropriate.

|                                                                                     | true                     | false                    | can't judge it at all    |
|-------------------------------------------------------------------------------------|--------------------------|--------------------------|--------------------------|
| 1. Strength training can help with fatigue.                                         | <input type="checkbox"/> | <input type="checkbox"/> | <input type="checkbox"/> |
| 2. Fatigue improves with sleep and rest.                                            | <input type="checkbox"/> | <input type="checkbox"/> | <input type="checkbox"/> |
| 3. Psychosocial interventions can help with fatigue.                                | <input type="checkbox"/> | <input type="checkbox"/> | <input type="checkbox"/> |
| 4. Fatigue should be treated pharmacologically.                                     | <input type="checkbox"/> | <input type="checkbox"/> | <input type="checkbox"/> |
| 5. Fatigue is an indicator for cancer disease progression.                          | <input type="checkbox"/> | <input type="checkbox"/> | <input type="checkbox"/> |
| 6. There are ways to mitigate fatigue.                                              | <input type="checkbox"/> | <input type="checkbox"/> | <input type="checkbox"/> |
| 7. The doctor can tell from the blood values whether fatigue is present.            | <input type="checkbox"/> | <input type="checkbox"/> | <input type="checkbox"/> |
| 8. Aerobic training can help with fatigue.                                          | <input type="checkbox"/> | <input type="checkbox"/> | <input type="checkbox"/> |
| 9. Yoga can help with fatigue.                                                      | <input type="checkbox"/> | <input type="checkbox"/> | <input type="checkbox"/> |
| 10. In the case of fatigue, the cancer therapy should definitely be discontinued.   | <input type="checkbox"/> | <input type="checkbox"/> | <input type="checkbox"/> |
| 11. With fatigue one should avoid physical activity or exercise as far as possible. | <input type="checkbox"/> | <input type="checkbox"/> | <input type="checkbox"/> |
| 12. Relaxation can help with fatigue.                                               | <input type="checkbox"/> | <input type="checkbox"/> | <input type="checkbox"/> |

**3. Do you feel extremely exhausted since cancer diagnosis/ treatment? [t0,t1,t2]**

- never/rarely
- sometimes
- often
- always

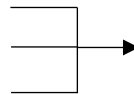 *please continue with question 3.1*

**3.1 To what extent do the following statements apply to you personally?**

---

|                                                   | fully disagree           | rather disagree          | rather agree             | fully agree              |
|---------------------------------------------------|--------------------------|--------------------------|--------------------------|--------------------------|
| 1. I feel helpless in the face of fatigue.        | <input type="checkbox"/> | <input type="checkbox"/> | <input type="checkbox"/> | <input type="checkbox"/> |
| 2. I feel well informed about exhaustion/fatigue. | <input type="checkbox"/> | <input type="checkbox"/> | <input type="checkbox"/> | <input type="checkbox"/> |

---

**4. Questions regarding content and layout of the information booklet. [t1]**

*For the following questions please tick the answer that best applies to you.*

---

|                                                            |                                                                                       |
|------------------------------------------------------------|---------------------------------------------------------------------------------------|
| 1. How did you find the layout of the information booklet? | <input type="checkbox"/> very good                                                    |
|                                                            | <input type="checkbox"/> good                                                         |
|                                                            | <input type="checkbox"/> okay                                                         |
|                                                            | <input type="checkbox"/> bad                                                          |
|                                                            | <input type="checkbox"/> very bad                                                     |
| 2. How did you experience reading the texts?               | <input type="checkbox"/> very arduous                                                 |
|                                                            | <input type="checkbox"/> arduous                                                      |
|                                                            | <input type="checkbox"/> enjoyable/interesting                                        |
|                                                            | <input type="checkbox"/> okay                                                         |
|                                                            | <input type="checkbox"/> boring                                                       |
| 3. How did you judge the information content?              | <input type="checkbox"/> too detailed                                                 |
|                                                            | <input type="checkbox"/> a bit too detailed                                           |
|                                                            | <input type="checkbox"/> appropriate                                                  |
|                                                            | <input type="checkbox"/> a bit too superficial                                        |
|                                                            | <input type="checkbox"/> too superficial                                              |
| 4. Did you read the whole information booklet?             | <input type="checkbox"/> Yes, I read it completely (including "further information"). |
|                                                            | <input type="checkbox"/> Yes, I read almost the whole booklet.                        |
|                                                            | <input type="checkbox"/> No, I read about half of the booklet.                        |
|                                                            | <input type="checkbox"/> No, I read less than half of the booklet.                    |
| 5. Would you recommend the information booklet?            | <input type="checkbox"/> yes                                                          |
|                                                            | <input type="checkbox"/> no                                                           |

---

**5. Which chapters of the information booklet did you find useful and/or interesting? [t1]**

|    |                                                                   | Chapter was useful/interesting |                          |                          |                          |
|----|-------------------------------------------------------------------|--------------------------------|--------------------------|--------------------------|--------------------------|
|    |                                                                   | very much                      | partly                   | somewhat                 | not at all               |
| 1. | Chapter 1: "What is fatigue?" (p.3-4)                             | <input type="checkbox"/>       | <input type="checkbox"/> | <input type="checkbox"/> | <input type="checkbox"/> |
| 2. | Chapter 2: "How do I find out that I suffer from fatigue?" (p. 5) | <input type="checkbox"/>       | <input type="checkbox"/> | <input type="checkbox"/> | <input type="checkbox"/> |
| 3. | Chapter 3: "What are potential causes of fatigue?" (p. 6)         | <input type="checkbox"/>       | <input type="checkbox"/> | <input type="checkbox"/> | <input type="checkbox"/> |
| 4. | Chapter 4: "What can I do about my fatigue?" (p. 7)               | <input type="checkbox"/>       | <input type="checkbox"/> | <input type="checkbox"/> | <input type="checkbox"/> |
| 5. | Supplementary Chapter: "Further information" (p. 8-10)            | <input type="checkbox"/>       | <input type="checkbox"/> | <input type="checkbox"/> | <input type="checkbox"/> |

**6. To what extent was the information booklet useful for you? [t1]**

|    |                                                                                                                         | fully disagree           | rather disagree          | rather agree             | fully agree              |
|----|-------------------------------------------------------------------------------------------------------------------------|--------------------------|--------------------------|--------------------------|--------------------------|
| 1. | The information booklet encouraged me to talk to family and/or friends about my exhaustion.                             | <input type="checkbox"/> | <input type="checkbox"/> | <input type="checkbox"/> | <input type="checkbox"/> |
| 2. | The information booklet helped me to find a suitable measure against exhaustion.                                        | <input type="checkbox"/> | <input type="checkbox"/> | <input type="checkbox"/> | <input type="checkbox"/> |
| 3. | The information booklet encouraged me to talk to a physician or to other health care professionals about my exhaustion. | <input type="checkbox"/> | <input type="checkbox"/> | <input type="checkbox"/> | <input type="checkbox"/> |
| 4. | The information booklet triggered or intensified fears or concerns about side effects of cancer treatment.              | <input type="checkbox"/> | <input type="checkbox"/> | <input type="checkbox"/> | <input type="checkbox"/> |
| 5. | The information booklet taught me new things about fatigue.                                                             | <input type="checkbox"/> | <input type="checkbox"/> | <input type="checkbox"/> | <input type="checkbox"/> |
| 6. | The information booklet made me realize that I am not alone with my problems.                                           | <input type="checkbox"/> | <input type="checkbox"/> | <input type="checkbox"/> | <input type="checkbox"/> |

**Further comments or suggestions concerning the information booklet: [t1]**
